# Supplementary material for: Investigation of Effects of Novel Bifidobacterium longum ssp. longum on Gastrointestinal Microbiota and Blood Serum Parameters in a Conventional Mouse Model
Source: MDPI journal article supplement (doi:10.3390/microorganisms12040840), 2024-04-22
Supplement: s1 [file s1]

**Table S1.** Relative abundance (%) of faecal microbiota genera of mice during the 15- and 30-day intervention period

| Phylum                            | Genus                                   | CG1      |           | CG2      |          |           | TG1      |           | TG2      |          |           |
|-----------------------------------|-----------------------------------------|----------|-----------|----------|----------|-----------|----------|-----------|----------|----------|-----------|
|                                   |                                         | At start | On Day 15 | At start | On Day15 | On Day 30 | At start | On Day 15 | At start | On Day15 | On Day 30 |
| <i>Bacteroidota</i>               | <i>Muribaculaceae</i>                   | 33.9     | 34.7      | 4.4      | 6.9      | 34.0      | 49.4     | 6.9       | 6.0      | 5.9      | 37.2      |
|                                   | <i>Alistipes</i>                        | 19.6     | 1.0       | 18.5     | 12.3     | 13.0      | 13.4     | 20.7      | 11.0     | 9.8      | 0.9       |
|                                   | <i>Prevotellaceae_UCG-1</i>             | 2.0      | 1.0       | 0.0      | 1.2      | 1.8       | 1.8      | 4.7       | 0.0      | 2.9      | 1.4       |
|                                   | <i>Bacteroides</i>                      | 0.0      | 6.4       | 1.8      | 8.9      | 7.3       | 9.9      | 9.0       | 15.0     | 13.5     | 0.6       |
|                                   | <i>Muribaculum</i>                      | 0.0      | 0.0       | 0.0      | 0.0      | 0.0       | 0.5      | 0.0       | 0.3      | 0.0      | 0.0       |
| <i>Bacillota</i>                  | <i>Bacillus</i>                         | 4.0      | 0.0       | 0.0      | 0.0      | 0.7       | 1.4      | 0.0       | 0.9      | 0.0      | 0.0       |
|                                   | <i>Lachnospiraceae_A2</i>               | 3.4      | 2.3       | 5.6      | 5.5      | 2.4       | 0.0      | 0.0       | 3.4      | 0.0      | 1.2       |
|                                   | <i>Lactobacillus</i>                    | 2.9      | 0.6       | 1.2      | 1.2      | 0.6       | 1.4      | 1.8       | 0.7      | 1.2      | 1.2       |
|                                   | <i>RF39</i>                             | 2.6      | 0.9       | 0.0      | 0.0      | 0.0       | 0.0      | 2.4       | 0.0      | 0.0      | 1.0       |
|                                   | <i>Lachnospiraceae_NK4A136_group</i>    | 2.3      | 23.9      | 32.1     | 24.1     | 1.1       | 2.8      | 2.2       | 29.3     | 25.7     | 22.9      |
|                                   | <i>Oscillibacter</i>                    | 1.7      | 1.0       | 0.0      | 1.3      | 0.9       | 1.3      | 1.2       | 1.7      | 1.5      | 1.1       |
|                                   | <i>Clostridiales_vadin_BB6_group</i>    | 1.4      | 1.2       | 1.9      | 0.9      | 1.0       | 0.0      | 1.7       | 0.0      | 1.4      | 0.8       |
|                                   | <i>Lachnospiraceae_UCG-1</i>            | 1.1      | 1.4       | 1.6      | 1.7      | 0.9       | 2.0      | 2.1       | 0.0      | 0.0      | 0.7       |
|                                   | <i>Colidextribacter</i>                 | 1.1      | 1.0       | 1.3      | 0.9      | 0.8       | 0.0      | 1.0       | 1.1      | 1.3      | 0.7       |
|                                   | <i>Streptococcus</i>                    | 0.7      | 0.0       | 0.0      | 0.0      | 0.0       | 0.0      | 0.0       | 0.0      | 0.0      | 0.0       |
|                                   | <i>Clostridia_UCG-14</i>                | 0.0      | 3.7       | 4.4      | 2.3      | 4.4       | 2.8      | 4.1       | 2.8      | 1.1      | 0.0       |
|                                   | <i>Roseburia</i>                        | 0.0      | 3.4       | 3.5      | 2.7      | 0.0       | 0.6      | 3.2       | 0.9      | 7.9      | 5.6       |
|                                   | <i>Marvinbryantia</i>                   | 0.0      | 0.5       | 0.0      | 0.0      | 0.0       | 0.0      | 0.0       | 0.0      | 0.0      | 0.0       |
|                                   | <i>Staphylococcus</i>                   | 0.0      | 0.0       | 0.9      | 0.0      | 0.0       | 0.0      | 2.4       | 0.0      | 0.0      | 0.0       |
|                                   | <i>[Eubacterium]_xylanophilum_group</i> | 0.0      | 0.0       | 0.7      | 0.7      | 0.3       | 0.0      | 0.0       | 0.5      | 0.6      | 1.0       |
|                                   | <i>Lachnospiraceae_UCG-6</i>            | 0.0      | 0.0       | 0.0      | 0.0      | 0.0       | 0.5      | 0.0       | 0.0      | 0.5      | 1.1       |
| <i>Actinomycetota</i>             | <i>Kocuria</i>                          | 0.9      | 0.0       | 0.0      | 0.0      | 0.0       | 0.0      | 0.0       | 0.0      | 0.0      | 0.0       |
|                                   | <i>Micrococcus</i>                      | 0.7      | 0.0       | 0.0      | 0.0      | 0.0       | 0.0      | 0.0       | 0.0      | 0.0      | 0.0       |
|                                   | <i>Adlercreutzia</i>                    | 0.0      | 0.5       | 0.0      | 4.4      | 4.7       | 0.7      | 0.7       | 6.2      | 0.7      | 3.7       |
|                                   | <i>Bifidobacterium</i>                  | 0.0      | 0.0       | 0.0      | 0.0      | 0.0       | 0.0      | 0.6       | 0.0      | 0.0      | 0.0       |
| <i>Candidatus Patescibacteria</i> | <i>Candidatus Saccharimonas</i>         | 2.9      | 7.8       | 2.3      | 12.7     | 15.7      | 0.6      | 17.6      | 6.9      | 11.0     | 7.9       |
| <i>Thermodesulfobacteriota</i>    | <i>Desulfovibrio</i>                    | 1.5      | 0.8       | 1.8      | 1.4      | 0.8       | 1.1      | 1.2       | 1.6      | 1.4      | 0.6       |
| <i>Deferribacterota</i>           | <i>Mucispirillum</i>                    | 0.7      | 0.0       | 0.0      | 0.0      | 0.0       | 0.0      | 0.0       | 0.6      | 0.0      | 0.0       |

|                       |                       |     |     |     |     |     |     |     |     |     |     |
|-----------------------|-----------------------|-----|-----|-----|-----|-----|-----|-----|-----|-----|-----|
| <i>Mycoplasmata</i>   | <i>Anaeroplasmata</i> | 2.0 | 0.8 | 2.2 | 0.7 | 0.8 | 1.6 | 3.2 | 1.1 | 0.9 | 0.9 |
| <i>Pseudomonadota</i> | <i>Pseudomonas</i>    | 0.0 | 0.0 | 1.9 | 0.0 | 2.0 | 0.0 | 0.0 | 0.0 | 0.6 | 0.0 |
| <i>Streptophyta</i>   | <i>Incertae sedis</i> | 0.0 | 0.0 | 0.0 | 0.0 | 0.0 | 0.4 | 0.0 | 0.0 | 0.6 | 0.0 |

CG – control group, TG – test group.
